# Supplementary material
Source: PubMed Central journal article supplement (PMC10356844)
Supplement: 41396_2023_1438_MOESM1_ESM.pdf [file 41396_2023_1438_MOESM1_ESM.pdf]

---

1  
2  
3  
4  
5  
6  
7  
8  
9  
10  
11  
12  
13  
14

## Supplementary information

**Viral lysing can alleviate microbial nutrient limitations and  
accumulate recalcitrant dissolved organic matter components in soil**

Di Tong<sup>a,b</sup>, Youjing Wang <sup>a,b</sup>, Haodan Yu <sup>a,b</sup>, Haojie Shen <sup>a,b</sup>, Randy A. Dahlgren <sup>c</sup>,  
Jianming Xu <sup>a,b\*</sup>

<sup>a</sup>Institute of Soil and Water Resources and Environmental Science, College of  
Environmental and Resource Sciences, Zhejiang University, Hangzhou 310058, China

<sup>b</sup>Zhejiang Provincial Key Laboratory of Agricultural Resources and Environment,  
Zhejiang University, Hangzhou 310058, China

<sup>c</sup>Department of Land, Air and Water Resources, University of California, Davis, CA,  
USA

\*Corresponding author. E-mail: [jmxu@zju.edu.cn](mailto:jmxu@zju.edu.cn).

---

## 15 **Supplementary Materials and Methods**

### 16 1. Analysis of extracellular enzyme activity and putative microbial physiological traits

17 Extracellular enzymes related to the degradation of organic carbon ( $\beta$ -1,4-  
18 glucosidase [BG], cellobiohydrolase [CBH]), nitrogen ( $\beta$ -1,4-N-acetyl-  
19 glucosaminidase [NAG] and L-leucine aminopeptidase [LAP]), and phosphorus (acid  
20 phosphatase [AP]) were quantified within 48 h of sample collection by fluorometric  
21 methods [1-3]. Briefly, 1 g soil was homogenized with 125 mL acetate buffer (50 mM,  
22 pH 5.0) and stirred vigorously for 2 h using a magnetic stir plate. Then, 50  $\mu$ L of soil  
23 slurry mixed with 100  $\mu$ L fluorometric substrate solution (200  $\mu$ mol L<sup>-1</sup>) and 50  $\mu$ L  
24 acetate buffer were incubated at 25 °C for 4 h, in the dark. The reaction was stopped by  
25 adding a 10  $\mu$ L aliquot of 1.0 M NaOH. A multifunctional microplate reader was used  
26 to measure fluorescence at 365 nm excitation and 450 nm emission wavelengths and  
27 expressed in the unit of nmol h<sup>-1</sup> g<sup>-1</sup> [4].

28 The lengths and angles of enzymatic vectors can be used to illustrate relative  
29 microbial resource acquisition strategies [4-5]. Vector length and angle were calculated  
30 as:

$$31 V_{length} = SQRT(x^2 + y^2) \quad (1)$$

$$32 V_{angle} (degree) = Degrees (Atan2(x, y)) \quad (2)$$

---

33 In these functions, x represents the relative activities of C vs. P acquiring enzymes  
 34 ( $[\text{BG} + \text{CBH}]/[\text{BG} + \text{CBH} + \text{AP}]$ ) and y represents the relative activities of C vs. N  
 35 acquiring enzymes ( $[\text{BG} + \text{CBH}]/[\text{BG} + \text{CBH} + \text{NAG} + \text{LAP}]$ ). SQRT signifies the  
 36 square root of the sum of the squared values of x and y, and Atan2 represents the four-  
 37 quadrant inverse tangent.

## 38 2. Calculation of microbial metabolic efficiency

39 Microbial metabolic efficiency can be represented by  $q\text{CO}_2$  and CUE, where  
 40 higher metabolic efficiency equates to lower  $q\text{CO}_2$  and higher CUE [6]. Soil  $q\text{CO}_2$   
 41 signifies microbial respiration per unit biomass and is expressed in the units of  $\text{mg CO}_2\text{-}$   
 42  $\text{C mg}^{-1} \text{MBC d}^{-1}$  [7]. According to the biogeochemical equilibrium model, CUE was  
 43 indirectly calculated as equations (3-5).

$$44 \quad CUE = CUE_{max} \times \sqrt{\frac{S_{C:N} \times S_{C:P}}{(K_{C:N} + S_{C:N}) \times (K_{C:P} + S_{C:P})}} \quad (3)$$

$$45 \quad S_{C:N} = B_{C:N} / L_{C:N} \times 1 / EEA_{C:N} \quad (4)$$

$$46 \quad S_{C:P} = B_{C:P} / L_{C:P} \times 1 / EEA_{C:P} \quad (5)$$

47 Where  $EEA_{C:N}$  and  $EEA_{C:P}$  were calculated as  $\ln(\text{BG})/\ln(\text{NAG} + \text{LAP})$  and  
 48  $\ln(\text{BG})/\ln(\text{AP})$ , respectively.  $L_{C:X}$  is the molar C:X ratio of labile substrates (e.g., labile  
 49 carbon, nitrogen and phosphorus represented by DOC, inorganic N ( $\text{NH}_4^+ + \text{NO}_3^-$ ) and  
 50 available P, respectively).  $B_{C:X}$  is the molar ratio of microbial biomass carbon, nitrogen

---

51 and phosphorus. According to thermodynamic constraints of the saturating Michaelis-  
52 Menten formulation,  $CUE_{max}$  represents the maximum microbial growth efficiency, and  
53 was set as 0.60.  $K_{C:X}$  was fixed to 0.50 and represents the half-saturation constant [6].  
54

---

55 **Supplementary Figures**

56 **Figure S1.** Cumulative CO<sub>2</sub> fluxes during incubation at 25°C (A) and 15°C (B).

57 **Figure S2.** Cumulative CO<sub>2</sub> emission for incubations at three time points of 7 d (A, B),  
58 28 d (C, D) and 98 d (E, F).

59 **Figure S3.** Calculation of Q<sub>10</sub> (mean ±std dev) at different groups.

60 **Figure S4.** Metabolic quotient (qCO<sub>2</sub>, respiration per unit of microbial biomass, mg  
61 CO<sub>2</sub>-C mg<sup>-1</sup> MBC d<sup>-1</sup>).

62 **Figure S5.** Microbial resource acquisition strategy.

63 **Figure S6.** Excitation-emission matrix (A, B, C) of DOM for three fluorescent  
64 components.

65 **Figure S7.** Hydrophobicity of DOM after incubation as determined by SUV260.

66 **Figure S8.** Correlation heatmap between microbial resource acquisition traits and  
67 optical properties of DOM.

68 **Figure S9.** Principal coordinates analysis (PCoA) of bacterial communities in different  
69 groups at incubation temperatures of 25 °C (A) and 15 °C (B).

70 **Figure S10.** Redundancy analysis (RDA) at OTU level demonstrating the effect of soil  
71 physicochemical properties on bacterial communities for different groups.

72

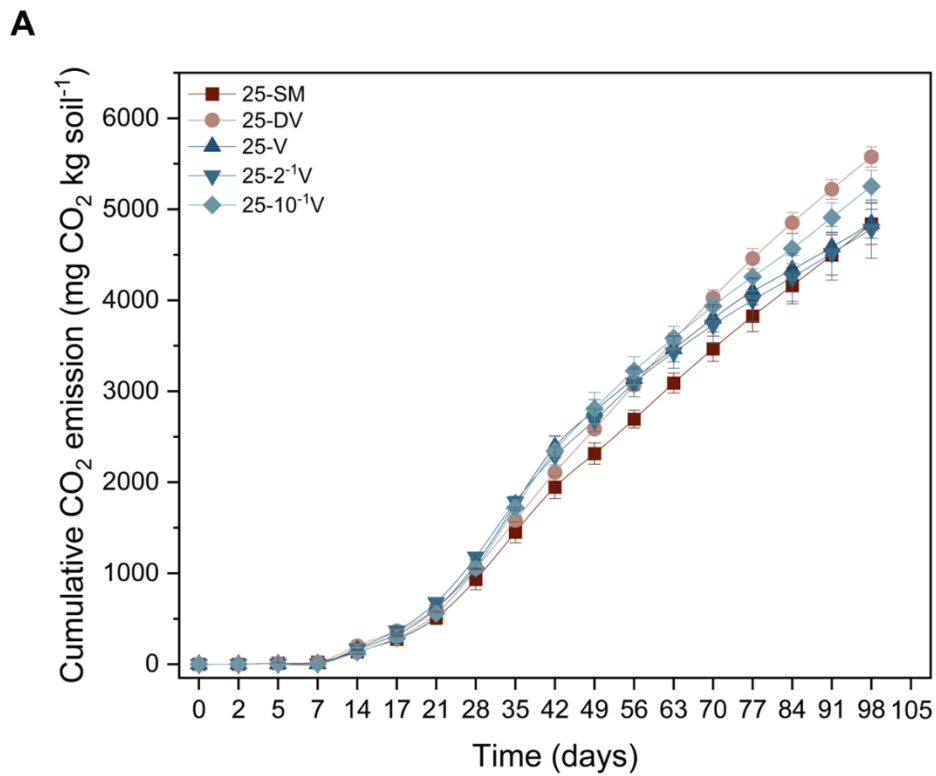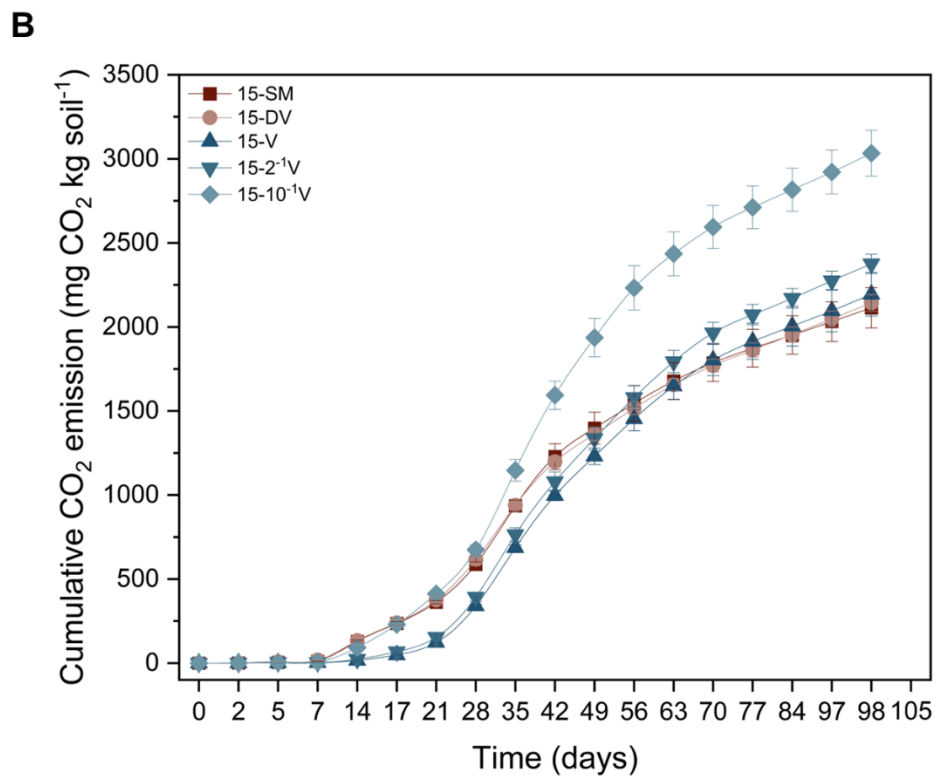

73

74 **Figure S1.** Cumulative CO<sub>2</sub> fluxes (mean ±std dev) during incubation at 25 °C (A) and

75 15 °C (B). SM, no added viruses; DV, added-inactive viruses; V, added-active viruses

---

76 with no dilution;  $2^{-1}$  V, added-active viruses with 2-fold dilution;  $10^{-1}$  V, added-active  
77 viruses with 10-fold dilution; 25 and 15 signify temperature (25°C and 15°C) during  
78 the incubation.  
79

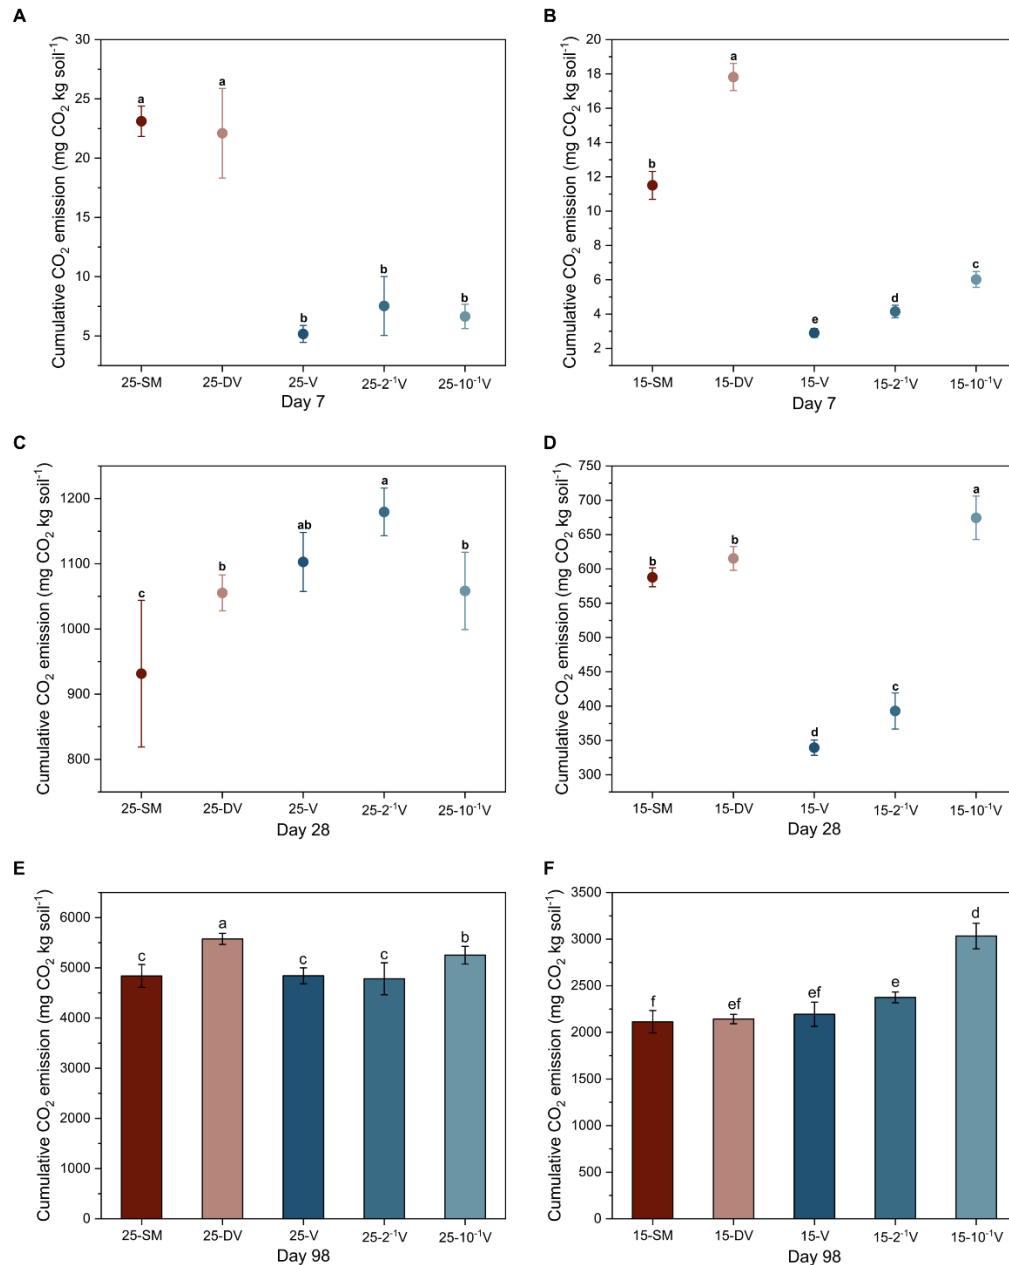

80

81 **Figure S2.** Cumulative CO<sub>2</sub> emission (mean ±std dev) for incubations at three time

82 points of 7 d (A, B), 28 d (C, D) and 98 d (E, F). SM, no added viruses; DV, added-

83 inactive viruses; V, added-active viruses with no dilution; 2<sup>-1</sup> V, added-active viruses

84 with 2-fold dilution; 10<sup>-1</sup> V, added-active viruses with 10-fold dilution; 25 and 15

85 signify temperature (25°C and 15°C) during the incubation. Different lowercase letters



---

86 represent significant differences at  $p < 0.05$ .

87

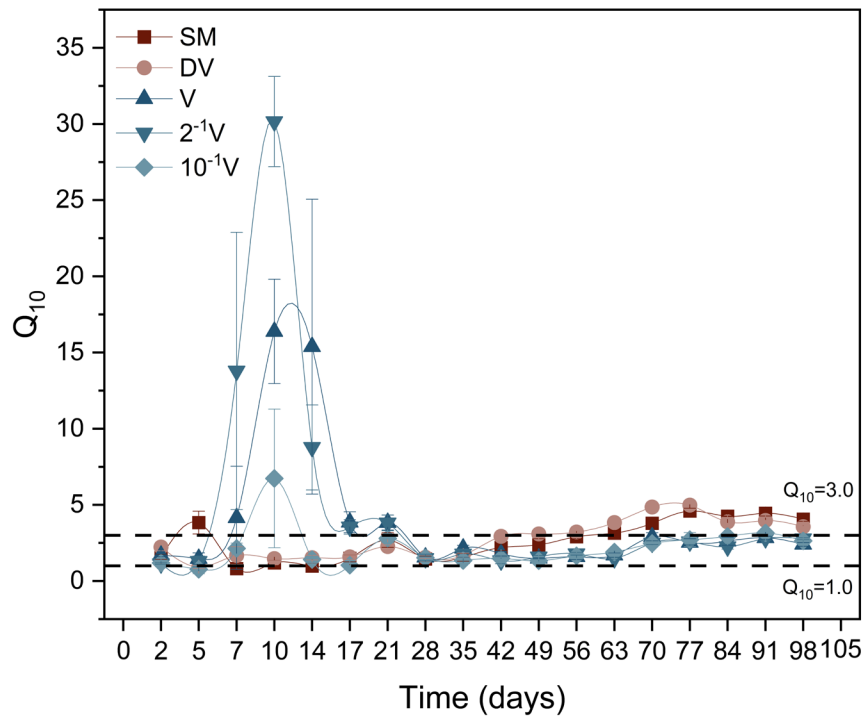

88

89 **Figure S3.** Calculation of  $Q_{10}$  (mean  $\pm$  std dev) at different groups. SM, no added viruses;

90 DV, added-inactive viruses; V, added-active viruses with no dilution;  $2^{-1}$  V, added-active

91 viruses with 2-fold dilution;  $10^{-1}$  V, added-active viruses with 10-fold dilution.

92

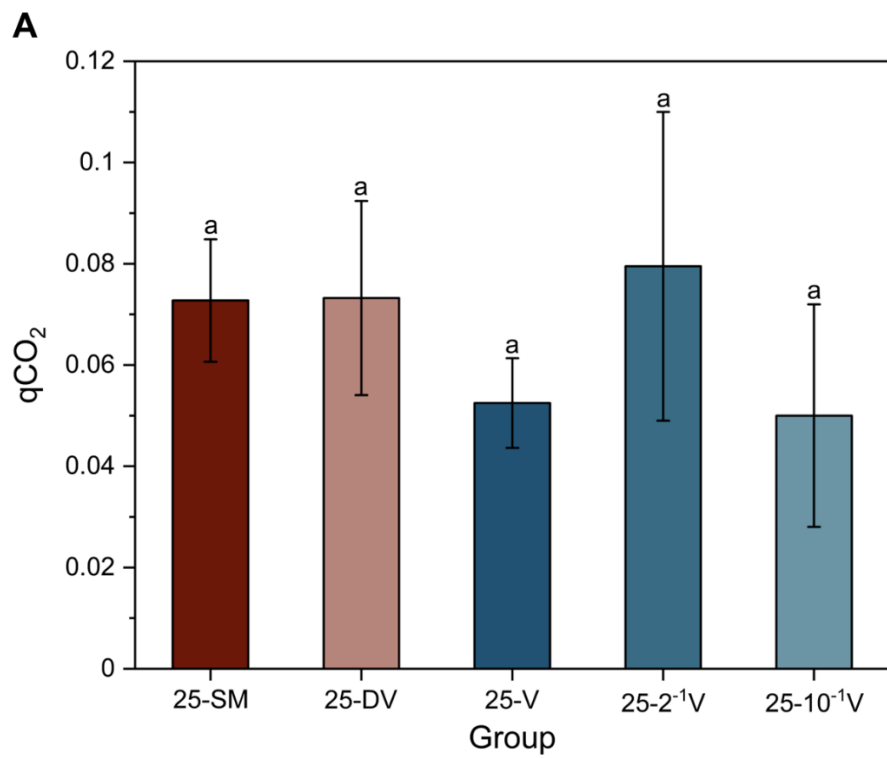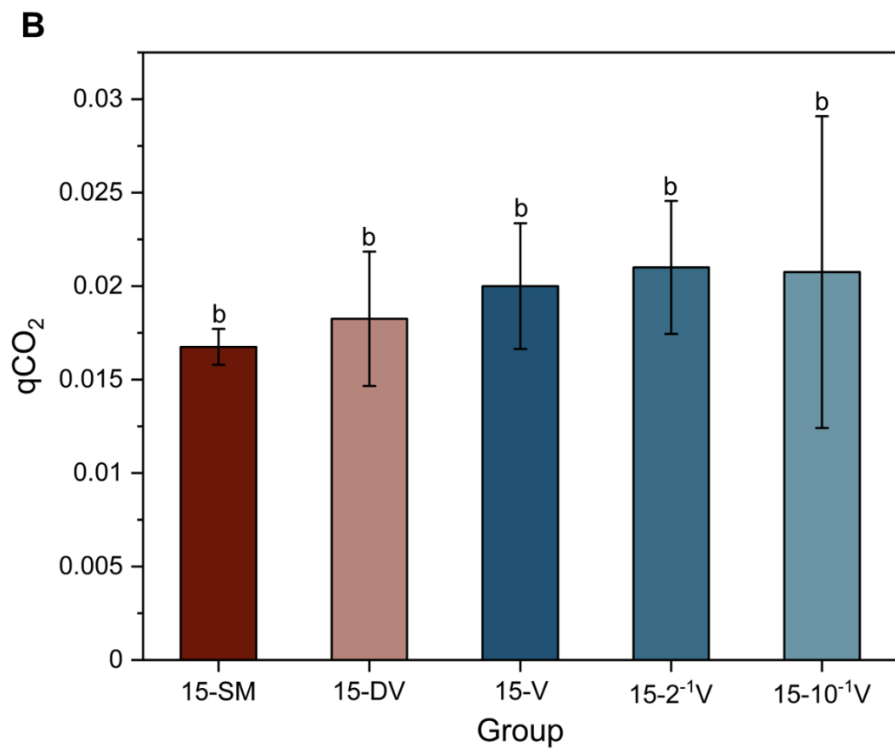

93

94 **Figure S4.** Metabolic quotient (mean  $\pm$ std dev;  $qCO_2$ , respiration per unit microbial

95 biomass,  $mg\ CO_2-C\ mg^{-1}\ MBC\ d^{-1}$ ). SM, no added viruses; DV, added-inactive viruses;

---

96 V, added-active viruses with no dilution;  $2^{-1}$  V, added-active viruses with 2-fold dilution;  
97  $10^{-1}$  V, added-active viruses with 10-fold dilution; 25 and 15 signify the temperature  
98 (25 °C and 15 °C) during the incubation. Different lowercase letters represent  
99 significant differences at  $p < 0.05$ .

100

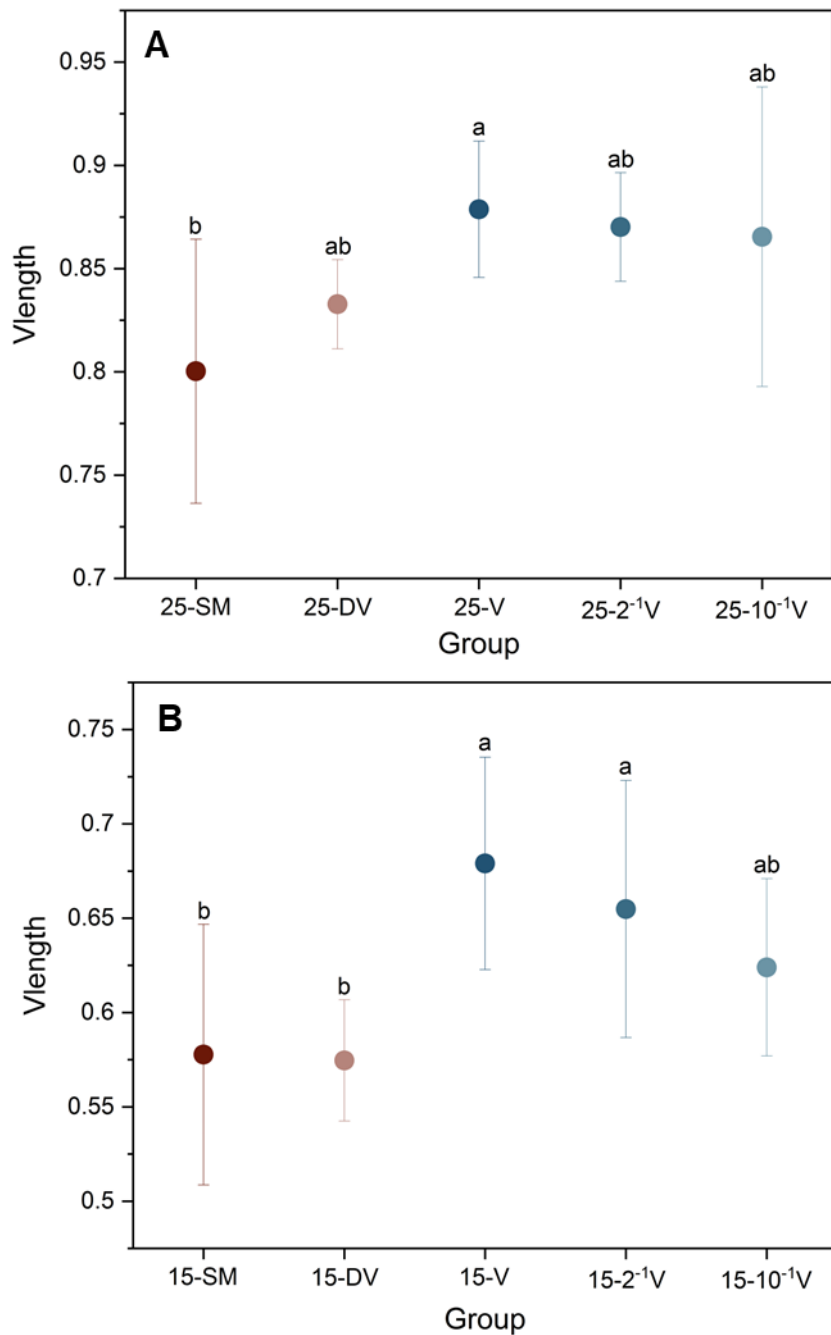

101

102 **Figure S5.** Microbial resource acquisition strategy (mean  $\pm$ std dev). The Length

103 quantified the relative C vs. nutrient (N and P)-acquiring enzyme activities. A lower

104 Length indicates relatively higher nutrient acquisition strategies (relative to C). SM, no

105 added viruses; DV, added-inactive viruses; V, added-active viruses with no dilution; 2<sup>-1</sup>

---

106 <sup>1</sup> V, added-active viruses with 2-fold dilution; 10<sup>-1</sup> V, added-active viruses with 10-fold  
107 dilution; 25 and 15 signify the temperature (25 °C and 15 °C) during the incubation.  
108 Different lowercase letters represent significant differences at  $p < 0.05$ .  
109

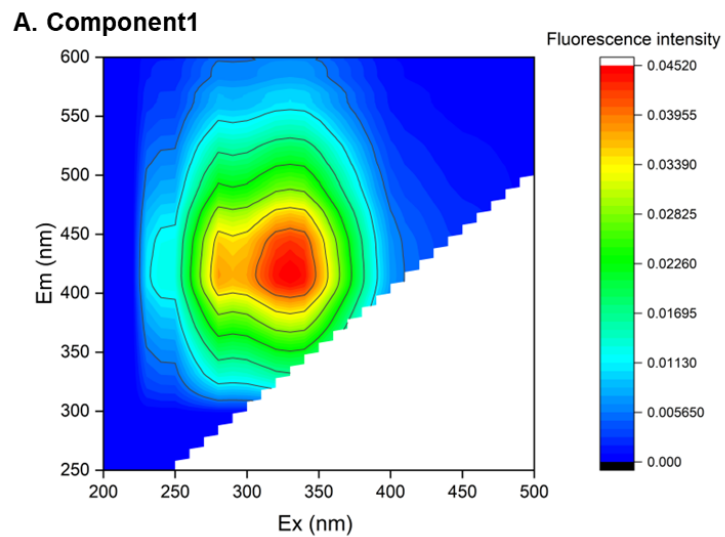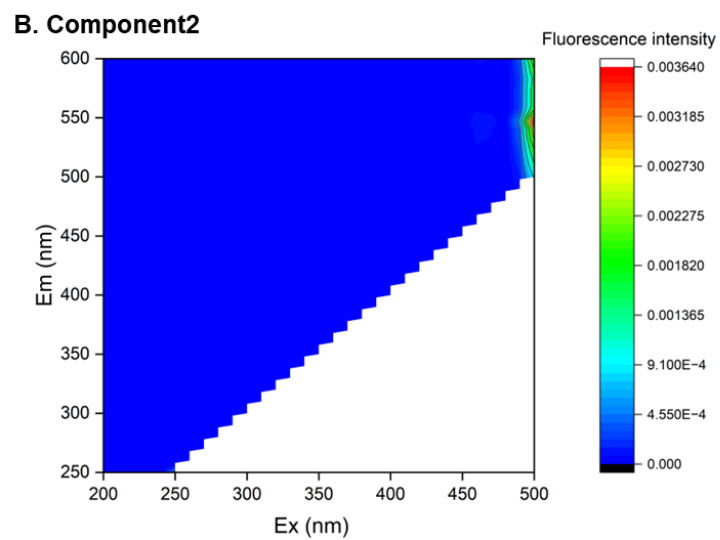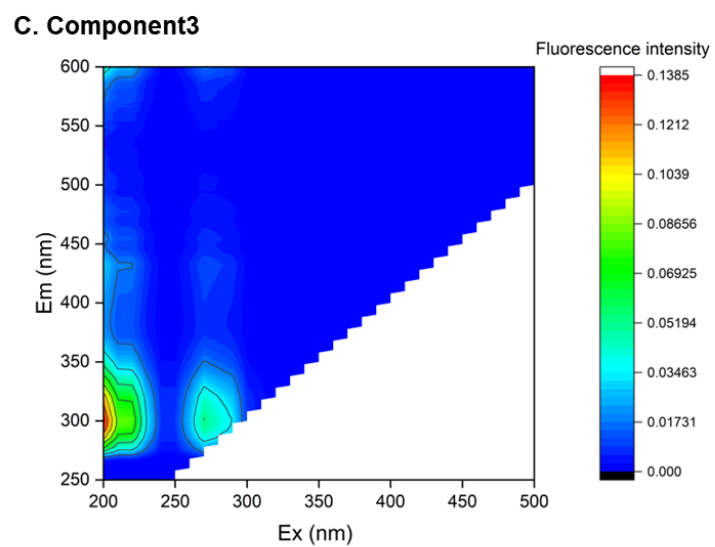

110

111 **Figure S6.** Excitation-emission matrix (A, B, C) of DOM for three fluorescent

---

112 components (Component 1: humic-like components [8-9]; Component 2: quinone-like  
113 components [10]; Component 3: protein-like component [11]) identified by EEM-  
114 PARAFAC analysis.  
115



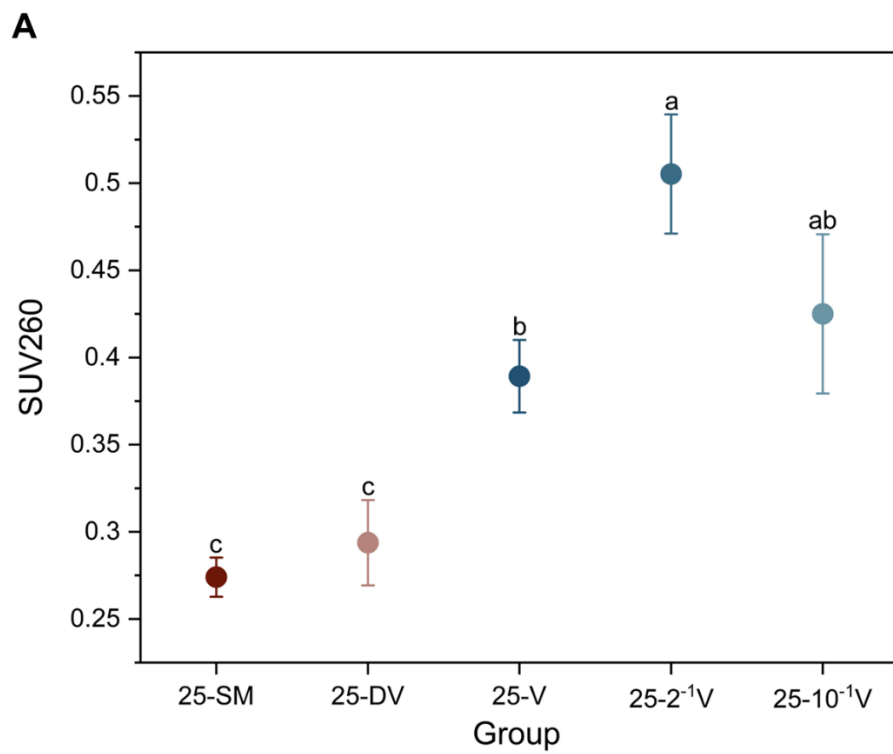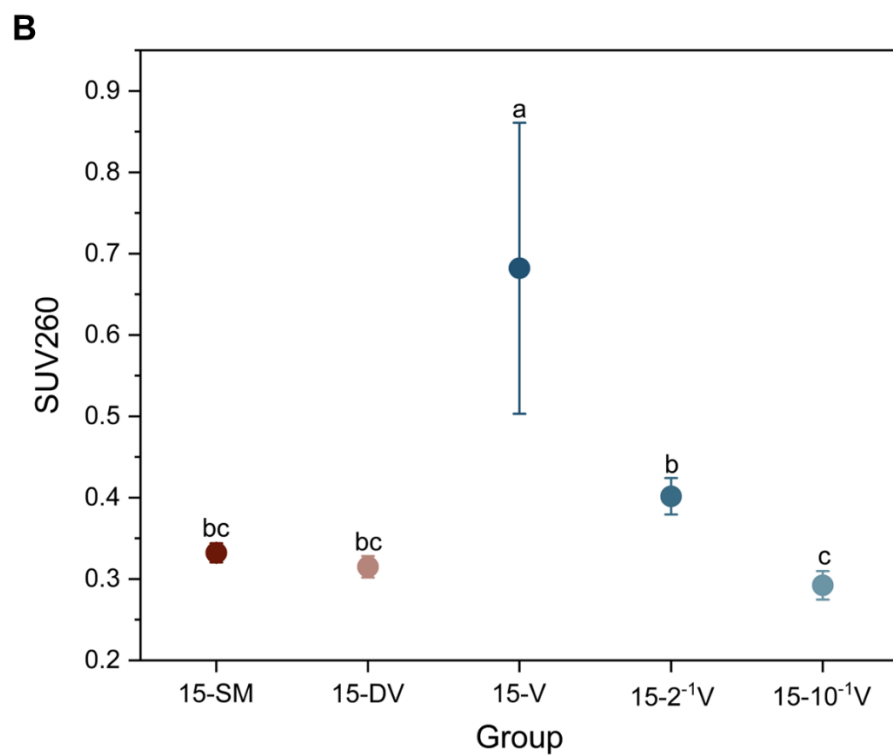

116

117 **Figure S7.** Hydrophobicity of DOM after incubation (mean ±std dev) as determined by

118 SUV260. SM, no added viruses; DV, added-inactive viruses; V, added-active viruses

---

119 with no dilution;  $2^{-1}$  V, added-active viruses with 2-fold dilution;  $10^{-1}$  V, added-active  
120 viruses with 10-fold dilution; 25 and 15 signify the temperature (25 °C and 15 °C)  
121 during the incubation. Different lowercase letters represent significant differences at  $p$   
122 < 0.05.  
123

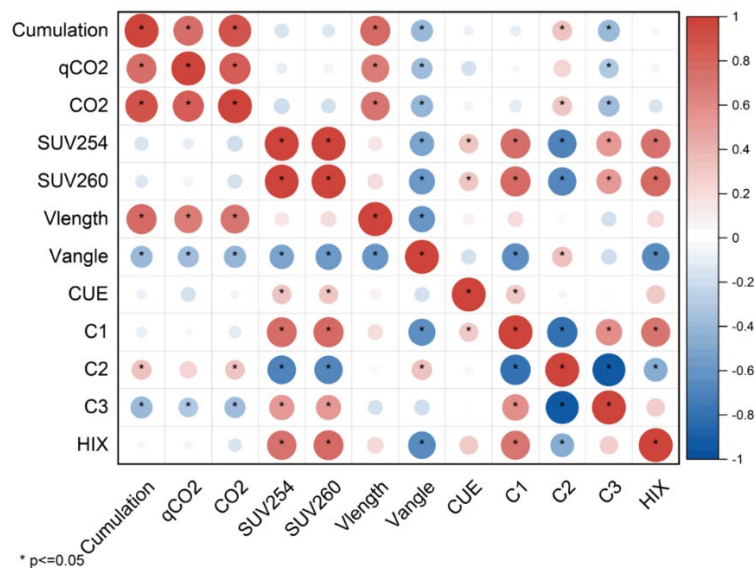

124

125 **Figure S8.** Correlation heatmap between microbial resource acquisition traits and

126 optical properties of DOM. Cumulation, cumulative CO<sub>2</sub> emission; qCO<sub>2</sub>, metabolic

127 quotient, CUE, carbon use efficiency; CO<sub>2</sub>, the CO<sub>2</sub> emission rate; HIX, aromaticity

128 degree of DOM; C1 (humic-like), C2 (quinone-like), and C3 (protein-like), different

129 3D-fluorescence components of DOM; SUV254, represents the humification of DOM;

130 SUV260, represents the hydrophobicity of DOM; Length, relative C:nutrient acquiring

131 ratio; Angle, relative P:N-acquiring ratio.

132

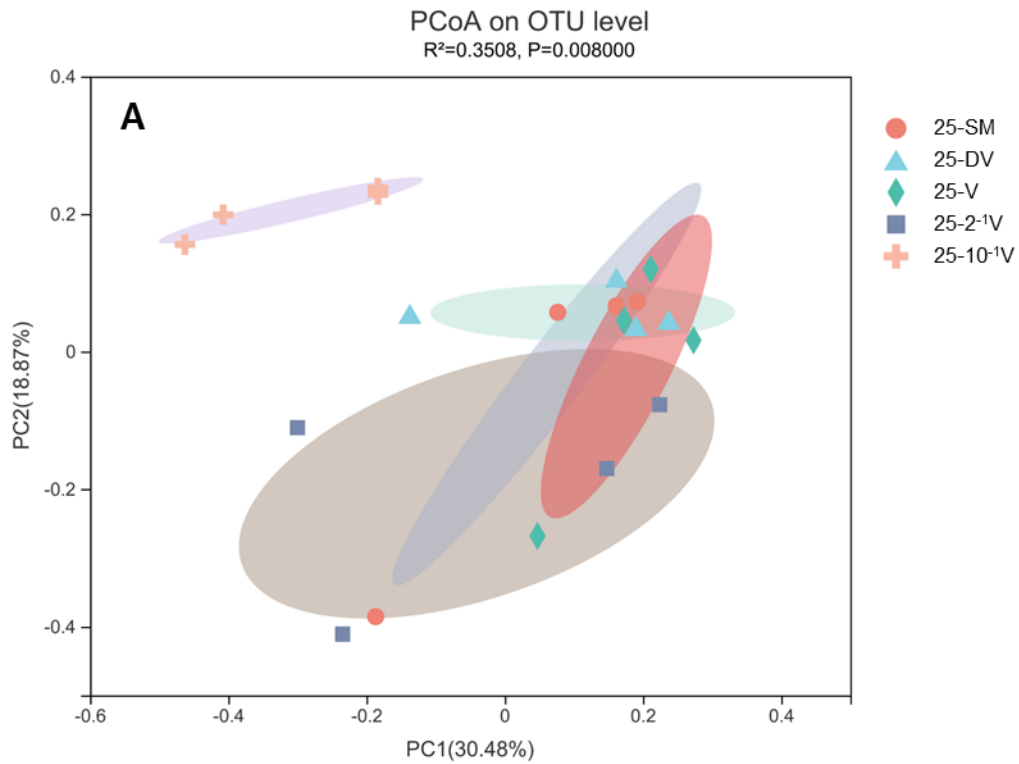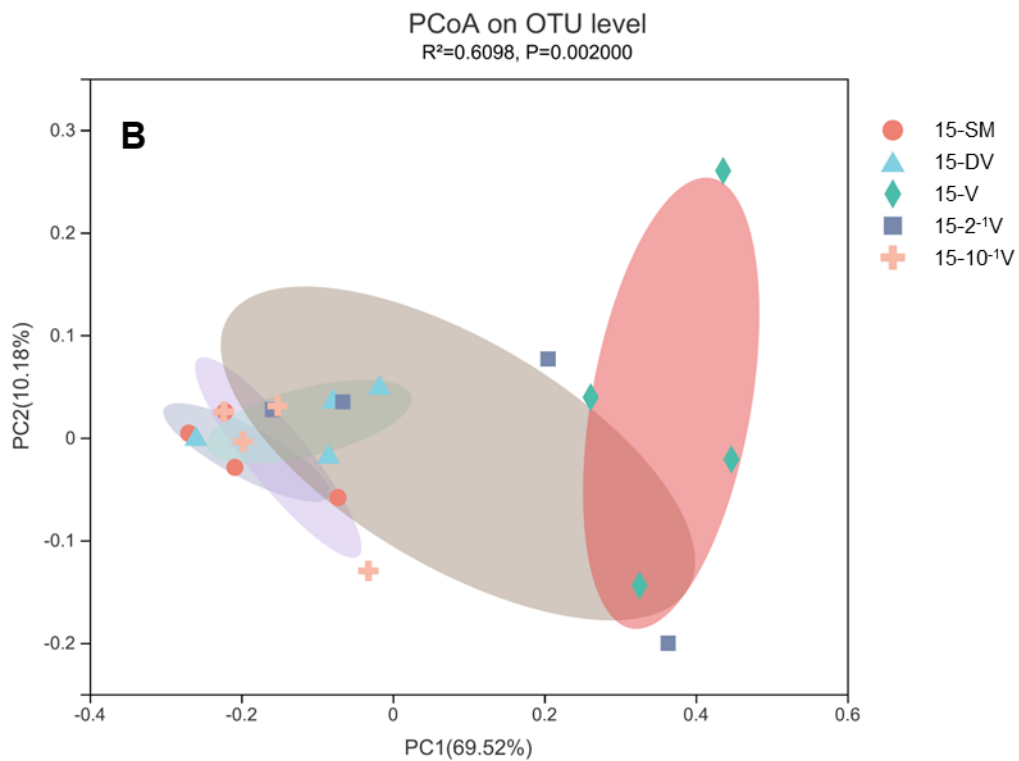

133

134 **Figure S9.** Principal coordinates analysis (PCoA) of bacterial communities in different

135 groups at incubation temperatures of 25 °C (A) and 15 °C (B).

136

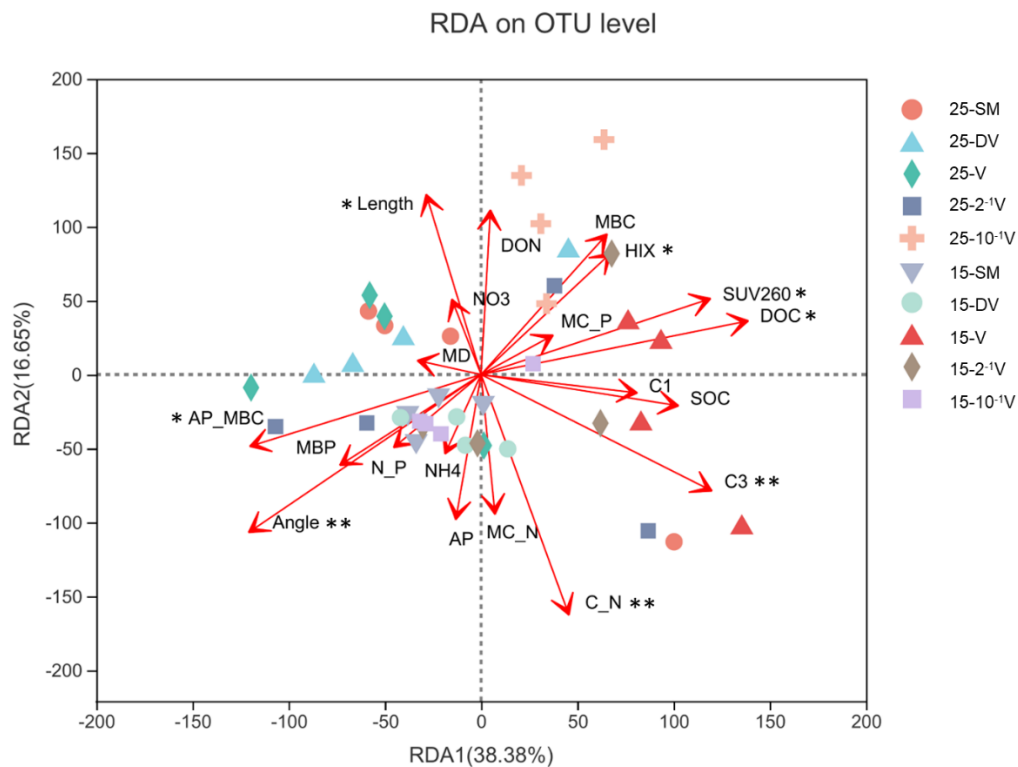

137

138 **Figure S10.** Redundancy analysis (RDA) at OTU level demonstrating the effect of soil  
 139 physicochemical properties on bacterial communities for different groups. NO<sub>3</sub>, soil  
 140 nitrate-N; NH<sub>4</sub>, soil ammonium-N; AP, available phosphorus; SOC, soil organic carbon;  
 141 TN, total nitrogen; DOC, dissolved organic carbon; DON, dissolved organic  
 142 nitrogen; N/P, the mass ratio of total nitrogen and total phosphorus; C/P, the mass ratio  
 143 of soil organic carbon and total phosphorus; C/N, the mass ratio of soil organic carbon  
 144 and total nitrogen; AP/MBC represents normalized enzyme activities of acid  
 145 phosphatase as units/mg MBC; Ecoenzymatic vector length (length, relative C:nutrient  
 146 acquiring ratio) and angle (angle, relative P:N-acquiring ratio); HIX, aromaticity degree  
 147 of DOM; C1 (humic-like), C3 (protein-like), different 3D-fluorescence components of

---

148 DOM; MD, relative molecular mass of DOM; SUV260, hydrophobicity of DOM; MBC,  
149 microbial biomass carbon; MBP, microbial biomass phosphorus. \* $p < 0.05$ ; \*\* $p < 0.01$ .  
150

---

151 **References:**

- 152 1. Zheng H, Vesterdal L, Schmidt IK, Rousk J. Ecoenzymatic stoichiometry can  
153 reflect microbial resource limitation, substrate quality, or both in forest soils. *Soil Biol*  
154 *Biochem.* 2022;167:108613.
- 155 2. Li B, Li Y, Fanin N, Han X, Du X, Liu H, et al. Adaptation of soil micro-food  
156 web to elemental limitation: evidence from the forest-steppe ecotone. *Soil Biol*  
157 *Biochem.* 2022;170:108698.
- 158 3. Saiya-Cork KR, Sinsabaugh RL, Zak DR. The effects of long term nitrogen  
159 deposition on extracellular enzyme activity in an *Acer saccharum* forest soil. *Soil Biol*  
160 *Biochem.* 2002;34:1309-15.
- 161 4. Cui Y, Fang L, Guo X, Han F, Ju W, Ye L, et al. Natural grassland as the optimal  
162 pattern of vegetation restoration in arid and semi-arid regions: evidence from nutrient  
163 limitation of soil microbes. *Sci Total Environ.* 2019;648:388-97.
- 164 5. Moorhead DL, Sinsabaugh RL, Hill BH, Weintraub MN. Vector analysis of  
165 ecoenzyme activities reveal constraints on coupled C, N and P dynamics. *Soil Biol*  
166 *Biochem.* 2016;93:1-7.
- 167 6. Feng J, Zeng X-M, Zhang Q, Zhou X-Q, Liu Y-R, Huang Q. Soil microbial  
168 trait-based strategies drive metabolic efficiency along an altitude gradient. *ISME*  
169 *Commun.* 2021:71.
- 170 7. Dong L, Li J, Zhang Y, Liu Y, Li A, Shangguan Z, et al. Forests have a higher  
171 soil C sequestration benefit due to lower C mineralization efficiency: evidence from the  
172 central loess plateau case. *Agric Ecosyst Environ.* 2022;339:108144.
- 173 8. Brogi SR, Cossarini G, Bachi G, Balestra C, Camatti E, Casotti R, et al.  
174 Evidence of Covid-19 lockdown effects on riverine dissolved organic matter dynamics

---

175 provides a proof-of-concept for needed regulations of anthropogenic emissions. *Sci*  
176 *Total Environ.* 2022;812:152412.

177 9. Ren W, Wu X, Ge X, Lin G, Zhou M, Long Z, et al. Characteristics of dissolved  
178 organic matter in lakes with different eutrophic levels in southeastern Hubei Province,  
179 China. *Chin J Oceanol Limnol.* 2021;39:1256-76.

180 10. Cory RM, McKnight DM. Fluorescence spectroscopy reveals ubiquitous  
181 presence of oxidized and reduced quinones in dissolved organic matter. *Environ Sci*  
182 *Technol.* 2005;39:8142-49.

183 11. Gao Z, Gueguen C. Distribution of thiol, humic substances and colored  
184 dissolved organic matter during the 2015 Canadian Arctic GEOTRACES cruises. *Mar*  
185 *Chem.* 2018;203:1-9.

186
