# Supplementary material
Source: PubMed Central journal article supplement (PMC10356844)
Supplement: 41396_2023_1438_MOESM2_ESM.pdf [file 41396_2023_1438_MOESM2_ESM.pdf]

Supplementary Information

**Viral lysing can alleviate microbial nutrient limitations and accumulate the recalcitrant dissolved organic matter components in soil**

Di Tong <sup>a,b</sup>, Youjing Wang <sup>a,b</sup>, Haodan Yu <sup>a,b</sup>, Haojie Shen <sup>a,b</sup>, Randy A. Dahlgren <sup>c</sup>, Jianming Xu <sup>a,b\*</sup>

<sup>a</sup>Institute of Soil and Water Resources and Environmental Science, College of Environmental and Resource Sciences, Zhejiang University, Hangzhou 310058, China

<sup>b</sup>Zhejiang Provincial Key Laboratory of Agricultural Resources and Environment, Zhejiang University, Hangzhou 310058, China

<sup>c</sup>Department of Land, Air and Water Resources, University of California, Davis, CA, USA

\*Corresponding author:

Dr. Jianming Xu, E-mail: [jmxu@zju.edu.cn](mailto:jmxu@zju.edu.cn).

Table S1. Relationships of the relative abundances of bacterial taxa with microbial physiological traits and optical properties of DOM.

| Temp | OTU     | Measured variables | Correlation | P value | Phylum             | Class                 | Order                                 | Family                                         | Genus                                          |
|------|---------|--------------------|-------------|---------|--------------------|-----------------------|---------------------------------------|------------------------------------------------|------------------------------------------------|
| 25°C | OTU1838 | SUV254             | -0.505      | 0.023   | p_Protobacteria    | c_Gammaproteobacteria | o_Xanthomonadales                     | f_Rhodanobacteraceae                           | g_Rhodanobacter                                |
| 25°C | OTU1838 | SUV260             | -0.520      | 0.019   | p_Protobacteria    | c_Gammaproteobacteria | o_Xanthomonadales                     | f_Rhodanobacteraceae                           | g_Rhodanobacter                                |
| 25°C | OTU787  | Angle              | 0.574       | 0.008   | p_Protobacteria    | c_Gammaproteobacteria | o_Xanthomonadales                     | f_Rhodanobacteraceae                           | g_Frateuria                                    |
| 25°C | OTU910  | SUV254             | -0.540      | 0.014   | p_Protobacteria    | c_Gammaproteobacteria | o_Xanthomonadales                     | f_Rhodanobacteraceae                           | g_Rhodanobacter                                |
| 25°C | OTU910  | SUV260             | -0.550      | 0.012   | p_Protobacteria    | c_Gammaproteobacteria | o_Xanthomonadales                     | f_Rhodanobacteraceae                           | g_Rhodanobacter                                |
| 25°C | OTU923  | Angle              | -0.674      | 0.001   | p_Bacteroidota     | c_Bacteroidia         | o_Bacteroidales                       | f_Prevotellaceae                               | g_Prevotella                                   |
| 25°C | OTU923  | HIX                | 0.681       | 0.001   | p_Bacteroidota     | c_Bacteroidia         | o_Bacteroidales                       | f_Prevotellaceae                               | g_Prevotella                                   |
| 25°C | OTU1043 | SUV254             | -0.535      | 0.015   | p_Protobacteria    | c_Gammaproteobacteria | o_Xanthomonadales                     | f_Rhodanobacteraceae                           | g_Rhodanobacter                                |
| 25°C | OTU1043 | SUV260             | -0.543      | 0.013   | p_Protobacteria    | c_Gammaproteobacteria | o_Xanthomonadales                     | f_Rhodanobacteraceae                           | g_Rhodanobacter                                |
| 25°C | OTU26   | SUV260             | -0.511      | 0.021   | p_Actinobacteriota | c_Actinobacteria      | o_Micrococcales                       | f_Micrococcaceae                               | g_Pseudarthrobacter                            |
| 25°C | OTU26   | Angle              | 0.520       | 0.019   | p_Actinobacteriota | c_Actinobacteria      | o_Micrococcales                       | f_Micrococcaceae                               | g_Pseudarthrobacter                            |
| 25°C | OTU960  | Angle              | -0.697      | 0.001   | p_Bacteroidota     | c_Bacteroidia         | o_Sphingobacteriales                  | f_Sphingobacteriaceae                          | g_norank_f_ST-12K33                            |
| 25°C | OTU960  | HIX                | 0.652       | 0.002   | p_Bacteroidota     | c_Bacteroidia         | o_Sphingobacteriales                  | f_Sphingobacteriaceae                          | g_norank_f_ST-12K33                            |
| 25°C | OTU44   | Angle              | -0.538      | 0.014   | p_Protobacteria    | c_Alphaproteobacteria | o_Rhizobiales                         | f_Bejerinckiaceae                              | g_Methylovirgula                               |
| 25°C | OTU44   | HIX                | 0.534       | 0.015   | p_Protobacteria    | c_Alphaproteobacteria | o_Rhizobiales                         | f_Bejerinckiaceae                              | g_Methylovirgula                               |
| 25°C | OTU43   | Angle              | 0.522       | 0.018   | p_Actinobacteriota | c_Actinobacteria      | o_Micrococcales                       | f_Micrococcaceae                               | g_Simonomas                                    |
| 25°C | OTU768  | Angle              | -0.697      | 0.001   | p_Firmicutes       | c_Clostridia          | o_Lachnospirales                      | f_Lachnospiraceae                              | g_Agathobacter                                 |
| 25°C | OTU768  | HIX                | 0.652       | 0.002   | p_Firmicutes       | c_Clostridia          | o_Lachnospirales                      | f_Lachnospiraceae                              | g_Agathobacter                                 |
| 25°C | OTU968  | Angle              | -0.681      | 0.001   | p_Firmicutes       | c_Clostridia          | o_Oscillospirales                     | f_Ruminococcaceae                              | g_Faecalibacterium                             |
| 25°C | OTU968  | HIX                | 0.704       | 0.001   | p_Firmicutes       | c_Clostridia          | o_Oscillospirales                     | f_Ruminococcaceae                              | g_Faecalibacterium                             |
| 25°C | OTU51   | SUV254             | -0.616      | 0.004   | c_norank_p_WPS-2   | c_norank_p_WPS-2      | c_norank_p_WPS-2                      | f_norank_o_norank_c_norank_p_WPS-2             | g_norank_f_norank_o_norank_c_norank_p_WPS-2    |
| 25°C | OTU51   | SUV260             | -0.626      | 0.003   | c_norank_p_WPS-2   | c_norank_p_WPS-2      | c_norank_p_WPS-2                      | f_norank_o_norank_c_norank_p_WPS-2             | g_norank_f_norank_o_norank_c_norank_p_WPS-2    |
| 25°C | OTU51   | Angle              | 0.680       | 0.001   | c_norank_p_WPS-2   | c_norank_p_WPS-2      | c_norank_p_WPS-2                      | f_norank_o_norank_c_norank_p_WPS-2             | g_norank_f_norank_o_norank_c_norank_p_WPS-2    |
| 25°C | OTU51   | HIX                | -0.734      | 0.000   | c_norank_p_WPS-2   | c_norank_p_WPS-2      | c_norank_p_WPS-2                      | f_norank_o_norank_c_norank_p_WPS-2             | g_norank_f_norank_o_norank_c_norank_p_WPS-2    |
| 25°C | OTU776  | Angle              | -0.695      | 0.001   | p_Firmicutes       | c_Clostridia          | o_norank_c_Clostridia                 | f_Hungateiclostridiaceae                       | g_Fastidiosipila                               |
| 25°C | OTU776  | HIX                | 0.649       | 0.002   | p_Firmicutes       | c_Clostridia          | o_norank_c_Clostridia                 | f_Hungateiclostridiaceae                       | g_Fastidiosipila                               |
| 25°C | OTU932  | Angle              | -0.693      | 0.001   | p_Firmicutes       | c_Clostridia          | o_Lachnospirales                      | f_Lachnospiraceae                              | g_Fusicatenibacter                             |
| 25°C | OTU932  | HIX                | 0.645       | 0.002   | p_Firmicutes       | c_Clostridia          | o_Lachnospirales                      | f_Lachnospiraceae                              | g_Fusicatenibacter                             |
| 25°C | OTU1329 | HIX                | 0.528       | 0.017   | p_Bacteroidota     | c_Bacteroidia         | o_Bacteroidales                       | f_Bacteroidaceae                               | g_Bacteroides                                  |
| 25°C | OTU30   | SUV254             | 0.584       | 0.007   | p_Actinobacteriota | c_Actinobacteria      | o_Streptomycetales                    | f_Streptomycetaceae                            | g_Streptomyces                                 |
| 25°C | OTU30   | SUV260             | 0.613       | 0.004   | p_Actinobacteriota | c_Actinobacteria      | o_Streptomycetales                    | f_Streptomycetaceae                            | g_Streptomyces                                 |
| 25°C | OTU30   | Angle              | -0.628      | 0.003   | p_Actinobacteriota | c_Actinobacteria      | o_Streptomycetales                    | f_Streptomycetaceae                            | g_Streptomyces                                 |
| 25°C | OTU30   | HIX                | 0.698       | 0.001   | p_Actinobacteriota | c_Actinobacteria      | o_Streptomycetales                    | f_Streptomycetaceae                            | g_Streptomyces                                 |
| 25°C | OTU1054 | Angle              | -0.693      | 0.001   | p_Cloacimonadota   | c_Cloacimonadota      | o_Cloacimonadales                     | f_Cloacimonadaceae                             | g_W5                                           |
| 25°C | OTU1054 | HIX                | 0.645       | 0.002   | p_Cloacimonadota   | c_Cloacimonadota      | o_Cloacimonadales                     | f_Cloacimonadaceae                             | g_W5                                           |
| 25°C | OTU840  | Angle              | -0.692      | 0.001   | p_Firmicutes       | c_Clostridia          | o_Lachnospirales                      | f_Lachnospiraceae                              | g_Blaugia                                      |
| 25°C | OTU840  | HIX                | 0.647       | 0.002   | p_Firmicutes       | c_Clostridia          | o_Lachnospirales                      | f_Lachnospiraceae                              | g_Blaugia                                      |
| 25°C | OTU987  | Angle              | -0.699      | 0.001   | p_Firmicutes       | c_Clostridia          | o_Peptostreptococcales-Tissierellales | f_norank_o_Peptostreptococcales-Tissierellales | g_W5053                                        |
| 25°C | OTU987  | HIX                | 0.660       | 0.002   | p_Firmicutes       | c_Clostridia          | o_Peptostreptococcales-Tissierellales | f_norank_o_Peptostreptococcales-Tissierellales | g_W5053                                        |
| 25°C | OTU994  | Angle              | -0.693      | 0.001   | p_Firmicutes       | c_Clostridia          | o_Lachnospirales                      | f_Lachnospiraceae                              | g_Blaugia                                      |
| 25°C | OTU994  | HIX                | 0.645       | 0.002   | p_Firmicutes       | c_Clostridia          | o_Lachnospirales                      | f_Lachnospiraceae                              | g_Blaugia                                      |
| 25°C | OTU844  | Angle              | -0.697      | 0.001   | p_Firmicutes       | c_Clostridia          | o_Oscillospirales                     | f_Ruminococcaceae                              | g_unclassified_f_Ruminococcaceae               |
| 25°C | OTU844  | HIX                | 0.652       | 0.002   | p_Firmicutes       | c_Clostridia          | o_Oscillospirales                     | f_Ruminococcaceae                              | g_unclassified_f_Ruminococcaceae               |
| 25°C | OTU938  | Angle              | -0.684      | 0.001   | p_Protobacteria    | c_Gammaproteobacteria | o_Alteromonadales                     | f_Pseudoalteromonadaceae                       | g_Pseudoalteromonas                            |
| 25°C | OTU938  | HIX                | 0.630       | 0.003   | p_Protobacteria    | c_Gammaproteobacteria | o_Alteromonadales                     | f_Pseudoalteromonadaceae                       | g_Pseudoalteromonas                            |
| 25°C | OTU794  | Angle              | -0.697      | 0.001   | p_Bacteroidota     | c_Bacteroidia         | o_Bacteroidales                       | f_Bacteroidaceae                               | g_Bacteroides                                  |
| 25°C | OTU794  | HIX                | 0.652       | 0.002   | p_Bacteroidota     | c_Bacteroidia         | o_Bacteroidales                       | f_Bacteroidaceae                               | g_Bacteroides                                  |
| 25°C | OTU1091 | Angle              | -0.693      | 0.001   | p_Bacteroidota     | c_Bacteroidia         | o_Bacteroidales                       | f_Bacteroidaceae                               | g_Bacteroides                                  |
| 25°C | OTU1091 | HIX                | 0.645       | 0.002   | p_Bacteroidota     | c_Bacteroidia         | o_Bacteroidales                       | f_Bacteroidaceae                               | g_Bacteroides                                  |
| 25°C | OTU982  | Angle              | -0.571      | 0.009   | p_Bacteroidota     | c_Bacteroidia         | o_Bacteroidales                       | f_Bacteroidaceae                               | g_Bacteroides                                  |
| 25°C | OTU1185 | Angle              | -0.693      | 0.001   | p_Firmicutes       | c_Clostridia          | o_Clostridiales                       | f_Clostridiaceae                               | g_Clostridium sensu stricto 1                  |
| 25°C | OTU1185 | HIX                | 0.645       | 0.002   | p_Firmicutes       | c_Clostridia          | o_Clostridiales                       | f_Clostridiaceae                               | g_Clostridium sensu stricto 1                  |
| 25°C | OTU1327 | Angle              | -0.699      | 0.001   | p_Firmicutes       | c_Bacilli             | o_Erysipelotrichales                  | f_Erysipelotrichaceae                          | g_Holdemanna                                   |
| 25°C | OTU1327 | HIX                | 0.660       | 0.002   | p_Firmicutes       | c_Bacilli             | o_Erysipelotrichales                  | f_Erysipelotrichaceae                          | g_Holdemanna                                   |
| 25°C | OTU1028 | Angle              | -0.697      | 0.001   | p_Firmicutes       | c_Negativicutes       | o_Veillonellales-Selenomonadales      | f_Veillonellaceae                              | g_Dialister                                    |
| 25°C | OTU1028 | HIX                | 0.652       | 0.002   | p_Firmicutes       | c_Negativicutes       | o_Veillonellales-Selenomonadales      | f_Veillonellaceae                              | g_Dialister                                    |
| 25°C | OTU1154 | Angle              | -0.699      | 0.001   | p_Firmicutes       | c_Clostridia          | o_norank_c_Clostridia                 | f_Hungateiclostridiaceae                       | g_Fastidiosipila                               |
| 25°C | OTU1154 | HIX                | 0.657       | 0.002   | p_Firmicutes       | c_Clostridia          | o_norank_c_Clostridia                 | f_Hungateiclostridiaceae                       | g_Fastidiosipila                               |
| 25°C | OTU1244 | Angle              | -0.699      | 0.001   | p_Firmicutes       | c_Clostridia          | o_Lachnospirales                      | f_Lachnospiraceae                              | g_Eubacterium hallii group                     |
| 25°C | OTU1244 | HIX                | 0.657       | 0.002   | p_Firmicutes       | c_Clostridia          | o_Lachnospirales                      | f_Lachnospiraceae                              | g_Eubacterium hallii group                     |
| 25°C | OTU895  | Angle              | -0.697      | 0.001   | p_Firmicutes       | c_Clostridia          | o_Oscillospirales                     | f_Ruminococcaceae                              | g_Ruminococcus                                 |
| 25°C | OTU895  | HIX                | 0.652       | 0.002   | p_Firmicutes       | c_Clostridia          | o_Oscillospirales                     | f_Ruminococcaceae                              | g_Ruminococcus                                 |
| 25°C | OTU602  | Angle              | -0.680      | 0.001   | p_Protobacteria    | c_Gammaproteobacteria | o_Diploricetiales                     | f_Diploricetaceae                              | g_norank_f_Diploricetaceae                     |
| 25°C | OTU602  | HIX                | 0.639       | 0.002   | p_Protobacteria    | c_Gammaproteobacteria | o_Diploricetiales                     | f_Diploricetaceae                              | g_norank_f_Diploricetaceae                     |
| 25°C | OTU1165 | Angle              | -0.697      | 0.001   | p_Firmicutes       | c_Clostridia          | o_Oscillospirales                     | f_Ruminococcaceae                              | g_Ruminococcus                                 |
| 25°C | OTU1165 | HIX                | 0.652       | 0.002   | p_Firmicutes       | c_Clostridia          | o_Oscillospirales                     | f_Ruminococcaceae                              | g_Ruminococcus                                 |
| 25°C | OTU898  | Angle              | -0.697      | 0.001   | p_Firmicutes       | c_Clostridia          | o_Lachnospirales                      | f_Lachnospiraceae                              | g_Blaugia                                      |
| 25°C | OTU898  | HIX                | 0.652       | 0.002   | p_Firmicutes       | c_Clostridia          | o_Lachnospirales                      | f_Lachnospiraceae                              | g_Blaugia                                      |
| 25°C | OTU32   | SUV254             | 0.551       | 0.012   | p_Protobacteria    | c_Gammaproteobacteria | o_Burkholderiales                     | f_Burkholderiaceae                             | g_Ralstonia                                    |
| 25°C | OTU32   | SUV260             | 0.551       | 0.012   | p_Protobacteria    | c_Gammaproteobacteria | o_Burkholderiales                     | f_Burkholderiaceae                             | g_Ralstonia                                    |
| 25°C | OTU32   | Angle              | -0.687      | 0.001   | p_Protobacteria    | c_Gammaproteobacteria | o_Burkholderiales                     | f_Burkholderiaceae                             | g_Ralstonia                                    |
| 25°C | OTU32   | HIX                | 0.546       | 0.013   | p_Protobacteria    | c_Gammaproteobacteria | o_Burkholderiales                     | f_Burkholderiaceae                             | g_Ralstonia                                    |
| 25°C | OTU879  | Angle              | -0.699      | 0.001   | p_Firmicutes       | c_Clostridia          | o_Oscillospirales                     | f_Ruminococcaceae                              | g_norank_f_Eubacterium coprostanoligenes group |
| 25°C | OTU879  | HIX                | 0.652       | 0.002   | p_Firmicutes       | c_Clostridia          | o_Oscillospirales                     | f_Ruminococcaceae                              | g_norank_f_Eubacterium coprostanoligenes group |
| 25°C | OTU1035 | Angle              | -0.693      | 0.001   | p_Firmicutes       | c_Clostridia          | o_Peptostreptococcales-Tissierellales | f_norank_o_Peptostreptococcales-Tissierellales | g_Gallicola                                    |
| 25°C | OTU1035 | HIX                | 0.656       | 0.002   | p_Firmicutes       | c_Clostridia          | o_Peptostreptococcales-Tissierellales | f_norank_o_Peptostreptococcales-Tissierellales | g_Gallicola                                    |
| 25°C | OTU607  | Angle              | -0.697      | 0.001   | p_Firmicutes       | c_Clostridia          | o_Lachnospirales                      | f_Lachnospiraceae                              | g_Lachnospiraceae NK4A136 group                |
| 25°C | OTU607  | HIX                | 0.652       | 0.002   | p_Firmicutes       | c_Clostridia          | o_Lachnospirales                      | f_Lachnospiraceae                              | g_Lachnospiraceae NK4A136 group                |
| 25°C | OTU1191 | Angle              | -0.697      | 0.001   | p_Firmicutes       | c_Clostridia          | o_Peptostreptococcales-Tissierellales | f_norank_o_Peptostreptococcales-Tissierellales | g_W5053                                        |
| 25°C | OTU1191 | HIX                | 0.652       | 0.002   | p_Firmicutes       | c_Clostridia          | o_Peptostreptococcales-Tissierellales | f_norank_o_Peptostreptococcales-Tissierellales | g_W5053                                        |
| 25°C | OTU921  | Angle              | -0.575      | 0.008   | p_Bacteroidota     | c_Bacteroidia         | o_Bacteroidales                       | f_Bacteroidaceae                               | g_Bacteroides                                  |
| 25°C | OTU921  | HIX                | 0.552       | 0.012   | p_Bacteroidota     | c_Bacteroidia         | o_Bacteroidales                       | f_Bacteroidaceae                               | g_Bacteroides                                  |
| 25°C | OTU941  | Angle              | -0.543      | 0.013   | p_Firmicutes       | c_Bacilli             | o_Bacillales                          | f_Bacillaceae                                  | g_Bacillus                                     |
| 25°C | OTU839  | Angle              | -0.699      | 0.001   | p_Firmicutes       | c_Clostridia          | o_Oscillospirales                     | f_Ruminococcaceae                              | g_Ruminococcus                                 |
| 25°C | OTU839  | HIX                | 0.660       | 0.002   | p_Firmicutes       | c_Clostridia          | o_Oscillospirales                     | f_Ruminococcaceae                              | g_Ruminococcus                                 |
| 25°C | OTU600  | Angle              | -0.699      | 0.001   | p_Firmicutes       | c_Clostridia          | o_Christensenellales                  | f_Christensenellaceae                          | g_Christensenellaceae R-7 group                |
| 25°C | OTU600  | HIX                | 0.657       | 0.002   | p_Firmicutes       | c_Clostridia          | o_Christensenellales                  | f_Christensenellaceae                          | g_Christensenellaceae R-7 group                |
| 25°C | OTU1179 | Angle              | -0.551      | 0.012   | p_Bacteroidota     | c_Bacteroidia         | o_Bacteroidales                       | f_Bacteroidaceae                               | g_Bacteroides                                  |
| 25°C | OTU686  | Angle              | -0.697      | 0.001   | p_Firmicutes       | c_Clostridia          | o_Lachnospirales                      | f_Lachnospiraceae                              | g_Blaugia                                      |
| 25°C | OTU686  | HIX                | 0.652       | 0.002   | p_Firmicutes       | c_Clostridia          | o_Lachnospirales                      | f_Lachnospiraceae                              | g_Blaugia                                      |
| 25°C | OTU1254 | Angle              | 0.755       | 0.000   | p_Protobacteria    | c_Gammaproteobacteria | o_Xanthomonadales                     | f_Rhodanobacteraceae                           | g_Dyella                                       |
| 25°C | OTU1254 | HIX                | -0.548      | 0.012   | p_Protobacteria    | c_Gammaproteobacteria | o_Xanthomonadales                     | f_Rhodanobacteraceae                           | g_Dyella                                       |
| 25°C | OTU1064 | Angle              | -0.693      | 0.001   | p_Firmicutes       | c_Clostridia          | o_Lachnospirales                      | f_Lachnospiraceae                              | g_Dorea                                        |
| 25°C | OTU1064 | HIX                | 0.645       | 0.002   | p_Firmicutes       | c_Clostridia          | o_Lachnospirales                      | f_Lachnospiraceae                              | g_Dorea                                        |
| 25°C | OTU814  | SUV254             | 0.502       | 0.024   | p_Protobacteria    | c_Gammaproteobacteria | o_Pseudomonadales                     | f_Pseudomonadaceae                             | g_Pseudomonas                                  |
| 25°C | OTU814  | Angle              | -0.811      | 0.000   | p_Protobacteria    | c_Gammaproteobacteria | o_Pseudomonadales                     | f_Pseudomonadaceae                             | g_Pseudomonas                                  |
| 25°C | OTU814  | HIX                | 0.664       | 0.001   | p_Protobacteria    | c_Gammaproteobacteria | o_Pseudomonadales                     | f_Pseudomonadaceae                             | g_Pseudomonas                                  |
| 25°C | OTU37   | Angle              | -0.521      | 0.019   | p_Protobacteria    | c_Alphaproteobacteria | o_Caulobacteriales                    | f_Caulobacteriaceae                            | g_norank_f_Caulobacteriaceae                   |
| 25°C | OTU1214 | Angle              | -0.697      | 0.001   | p_Firmicutes       | c_Clostridia          | o_Lachnospirales                      | f_Lachnospiraceae                              | g_Roseburia                                    |
| 25°C | OTU1214 | HIX                | 0.652       | 0.002   | p_Firmicutes       | c_Clostridia          | o_Lachnospirales                      | f_Lachnospiraceae                              | g_Roseburia                                    |
| 25°C | OTU757  | SUV254             | 0.537       | 0.015   | p_Protobacteria    | c_Gammaproteobacteria | o_Enterobacteriales                   | f_Enterobacteriaceae                           | g_Escherichia-Shigella                         |
| 25°C | OTU757  | SUV260             | 0.525       | 0.017   | p_Protobacteria    | c_Gammaproteobacteria | o_Enterobacteriales                   | f_Enterobacteriaceae                           | g_Escherichia-Shigella                         |
| 25°C | OTU757  | Angle              | -0.555      | 0.011   | p_Protobacteria    | c_Gammaproteobacteria | o_Enterobacteriales                   | f_Enterobacteriaceae                           | g_Escherichia-Shigella                         |
| 25°C | OTU757  | HIX                | 0.690       | 0.001   | p_Protobacteria    | c_Gammaproteobacteria | o_Enterobacteriales                   | f_Enterobacteriaceae                           | g_Escherichia-Shigella                         |
| 25°C | OTU866  | Angle              | -0.697      | 0.001   | p_Acidobacteriota  | c_A                   |                                       |                                                |                                                |

Table S2. Soil properties in different groups (mean ±std dev).

| Soil properties              | 25-SM          | 25-DV          | 25-V           | 25-2 <sup>1</sup> V | 25-10 <sup>1</sup> V | 15-SM          | 15-DV          | 15-V           | 15-2 <sup>1</sup> V | 15-10 <sup>1</sup> V | Day   |
|------------------------------|----------------|----------------|----------------|---------------------|----------------------|----------------|----------------|----------------|---------------------|----------------------|-------|
| TN                           | 0.939±0.010    | 0.936±0.006    | 0.924±0.014    | 0.917±0.008         | 0.929±0.012          | 0.901±0.013    | 0.839±0.022    | 0.828±0.019    | 0.833±0.015         | 0.816±0.016          | 7day  |
| SOC                          | 13.157±0.179   | 13.349±0.212   | 13.066±0.045   | 13.436±0.169        | 13.808±0.102         | 13.262±0.150   | 12.978±0.185   | 13.335±0.134   | 13.261±0.090        | 13.185±0.222         | 7day  |
| C/N                          | 14.007±0.075   | 14.269±0.198   | 14.149±0.197   | 14.653±0.153        | 14.876±0.304         | 14.725±0.195   | 15.496±0.262   | 16.115±0.233   | 15.932±0.256        | 16.163±0.133         | 7day  |
| DOC                          | 381.475±15.788 | 388.300±21.582 | 258.013±4.297  | 391.825±13.741      | 484.188±19.134       | 537.375±13.895 | 252.800±2.635  | 245.263±6.003  | 444.838±20.871      | 388.250±19.979       | 7day  |
| DON                          | 121.763±1.014  | 114.288±2.577  | 97.125±1.176   | 116.063±2.172       | 133.800±2.434        | 131.988±4.523  | 102.763±0.741  | 100.063±1.852  | 121.513±8.878       | 114.725±7.412        | 7day  |
| MBC                          | 376.667±13.614 | 283.111±66.168 | 320.222±23.435 | 387.556±98.145      | 322.000±23.401       | 246.222±37.102 | 420.667±50.937 | 379.111±6.206  | 143.333±59.908      | 252.889±31.865       | 7day  |
| MBN                          | 14.815±3.069   | 20.741±1.001   | 7.407±1.210    | 21.481±1.512        | 28.333±7.354         | 27.407±9.017   | 19.259±1.090   | 21.235±6.696   | 40.000±5.030        | 24.444±3.230         | 7day  |
| MC/N                         | 23.039±6.527   | 13.650±3.190   | 45.496±4.795   | 18.637±5.568        | 13.891±3.799         | 10.970±2.064   | 22.262±3.501   | 23.155±6.011   | 3.583±1.498         | 10.345±1.304         | 7day  |
| MBP                          | 2.205±0.045    | 9.046±0.265    | 13.645±0.918   | 4.538±1.493         | 4.499±0.277          | 7.642±2.258    | 2.095±0.470    | 6.295±0.649    | 2.211±0.757         | 7.994±0.595          | 7day  |
| MC/P                         | 171.365±9.510  | 32.008±8.525   | 24.033±2.984   | 103.391±24.227      | 72.872±7.914         | 59.030±32.860  | 221.999±39.675 | 62.355±6.878   | 87.304±28.071       | 31.218±1.976         | 7day  |
| MN/P                         | 6.774±1.517    | 2.299±0.068    | 0.564±0.116    | 6.944±2.597         | 6.322±1.700          | 5.906±2.863    | 11.171±3.244   | 3.270±0.846    | 26.466±9.499        | 3.116±0.262          | 7day  |
| TP                           | 0.288±0.011    | 0.350±0.022    | 0.415±0.013    | 0.287±0.006         | 0.303±0.007          | 0.314±0.009    | 0.317±0.005    | 0.305±0.008    | 0.456±0.003         | 0.302±0.008          | 7day  |
| C/P                          | 45.885±1.950   | 36.762±1.262   | 31.564±0.998   | 46.908±0.750        | 43.100±2.207         | 43.308±0.422   | 40.896±0.302   | 43.896±1.514   | 29.101±0.343        | 41.365±2.422         | 7day  |
| N/P                          | 3.276±0.143    | 2.580±0.116    | 2.233±0.085    | 3.202±0.061         | 2.907±0.188          | 2.942±0.041    | 2.641±0.041    | 2.729±0.131    | 1.828±0.033         | 2.559±0.144          | 7day  |
| AP                           | 3.762±0.121    | 2.858±0.190    | 1.702±0.126    | 3.408±0.169         | 3.010±0.205          | 4.618±0.214    | 6.502±0.850    | 3.131±0.346    | 3.770±0.344         | 3.577±0.552          | 7day  |
| NH <sub>4</sub> <sup>+</sup> | 8.984±0.843    | 10.192±0.271   | 11.265±0.167   | 8.060±0.252         | 6.961±0.572          | 8.362±0.430    | 11.177±0.090   | 12.061±0.048   | 13.635±0.861        | 9.737±0.368          | 7day  |
| NO <sub>3</sub> <sup>-</sup> | 0.763±0.001    | 0.799±0.016    | 0.650±0.013    | 0.749±0.013         | 0.864±0.004          | 0.836±0.019    | 0.614±0.012    | 0.610±0.011    | 0.798±0.010         | 0.791±0.015          | 7day  |
| BG/MBC                       | 0.125±0.045    | 2.032±0.406    | 0.260±0.034    | 1.258±0.446         | 1.054±0.120          | 2.660±0.575    | 0.083±0.009    | 0.177±0.006    | 6.402±3.271         | 1.701±0.271          | 7day  |
| CBH/MBC                      | 0.195±0.015    | 0.557±0.094    | 0.022±0.002    | 0.441±0.132         | 0.262±0.025          | 2.113±0.356    | 0.045±0.006    | 0.008±0.001    | 5.434±2.575         | 1.318±0.210          | 7day  |
| NAG/MBC                      | 0.032±0.002    | 0.061±0.010    | 0.036±0.006    | 0.278±0.152         | 0.359±0.091          | 0.502±0.107    | 0.061±0.018    | 0.095±0.008    | 1.455±0.661         | 0.421±0.077          | 7day  |
| LAP/MBC                      | 0.051±0.018    | 0.061±0.010    | 0.036±0.006    | 0.066±0.023         | 0.025±0.004          | 0.088±0.016    | 0.065±0.011    | 0.067±0.003    | 0.227±0.076         | 0.125±0.038          | 7day  |
| AP/MBC                       | 1.203±0.167    | 1.615±0.210    | 1.622±0.070    | 2.366±0.812         | 1.040±0.141          | 1.278±0.188    | 1.098±0.169    | 1.175±0.038    | 4.525±2.101         | 1.199±0.163          | 7day  |
| TN                           | 0.85±0.007     | 0.844±0.025    | 0.815±0.01     | 0.992±0.177         | 0.838±0.014          | 0.843±0.054    | 0.801±0.019    | 2.519±0.984    | 10.324±1.637        | 26.069±4.210         | 28day |
| SOC                          | 13.085±0.106   | 12.951±0.239   | 13.015±0.132   | 13.135±0.500        | 13.272±0.195         | 13.324±0.173   | 13.215±0.218   | 13.492±0.174   | 12.940±0.140        | 13.044±0.170         | 28day |
| C/N                          | 15.396±0.163   | 15.373±0.238   | 15.974±0.176   | 14.463±2.270        | 15.862±0.437         | 15.976±0.868   | 16.509±0.206   | 9.227±3.410    | 1.357±0.224         | 0.540±0.085          | 28day |
| DOC                          | 313.400±9.617  | 284.000±7.478  | 254.083±17.714 | 302.867±6.405       | 354.267±10.746       | 256.583±1.602  | 234.167±4.529  | 224.533±6.323  | 273.767±11.024      | 239.033±11.849       | 28day |
| DON                          | 97.000±1.059   | 97.633±2.053   | 92.883±3.924   | 102.933±1.158       | 116.433±1.455        | 93.283±0.631   | 85.517±1.567   | 81.600±2.340   | 87.667±2.796        | 81.0167±3.331        | 28day |
| MBC                          | 424.593±21.671 | 498.370±21.173 | 543.111±10.685 | 501.185±57.555      | 606.185±91.567       | 330.173±28.026 | 327.407±11.214 | 310.815±10.895 | 314.444±23.583      | 347.778±86.684       | 28day |
| MBN                          | 48.642±5.144   | 37.037±5.452   | 53.827±0.630   | 74.012±33.369       | 66.975±21.406        | 73.827±25.979  | 57.963±34.404  | 10.617±2.744   | 30.617±6.723        | 36.543±7.029         | 28day |
| MC/N                         | 9.026±1.107    | 14.481±2.352   | 10.100±0.310   | 11.545±5.696        | 11.246±2.387         | 7.123±2.833    | 11.574±3.670   | 45.336±21.676  | 11.613±2.371        | 11.209±3.898         | 28day |
| MBP                          | 6.546±0.426    | 17.262±0.565   | 22.451±0.514   | 18.219±0.670        | 15.390±0.702         | 11.135±1.494   | 10.394±0.968   | 9.227±0.379    | 7.489±1.314         | 11.886±1.235         | 28day |
| MC/P                         | 65.833±6.065   | 29.005±1.780   | 24.241±0.839   | 27.464±2.723        | 40.372±7.497         | 31.892±5.680   | 32.501±3.906   | 33.730±0.735   | 46.303±8.228        | 28.672±6.608         | 28day |
| MN/P                         | 7.375±0.335    | 2.182±0.374    | 2.401±0.054    | 4.101±1.791         | 4.514±1.510          | 6.072±1.402    | 5.561±3.304    | 1.150±0.293    | 4.408±1.207         | 3.207±0.670          | 28day |
| TP                           | 0.275±0.003    | 0.284±0.004    | 0.282±0.002    | 0.274±0.005         | 0.263±0.011          | 0.307±0.003    | 0.256±0.011    | 0.284±0.001    | 0.295±0.003         | 0.290±0.003          | 28day |
| C/P                          | 47.542±0.720   | 45.684±1.385   | 46.113±0.642   | 48.045±2.476        | 50.798±2.398         | 43.483±1.017   | 52.087±3.273   | 47.571±0.630   | 43.798±0.049        | 44.994±0.419         | 28day |
| N/P                          | 3.089±0.057    | 2.976±0.123    | 2.887±0.020    | 3.592±0.575         | 3.198±0.080          | 2.742±0.139    | 3.161±0.229    | 8.875±3.464    | 35.017±5.694        | 89.843±14.487        | 28day |
| AP                           | 1.758±0.052    | 2.117±0.10     | 1.626±0.179    | 1.684±0.180         | 1.380±0.021          | 2.762±0.209    | 1.635±0.080    | 1.494±0.141    | 2.351±0.153         | 1.774±0.10           | 28day |
| NH <sub>4</sub> <sup>+</sup> | 9.417±0.889    | 14.241±0.242   | 13.210±0.628   | 12.704±0.782        | 11.163±0.477         | 8.687±0.797    | 9.658±0.161    | 9.870±0.047    | 9.758±0.482         | 11.039±1.105         | 28day |
| NO <sub>3</sub> <sup>-</sup> | 0.685±0.028    | 0.719±0.008    | 0.648±0.026    | 0.756±0.030         | 0.809±0.038          | 0.566±0.019    | 0.562±0.012    | 0.592±0.014    | 0.732±0.018         | 0.812±0.071          | 28day |
| BG/MBC                       | 0.400±0.058    | 0.799±0.031    | 0.243±0.035    | 0.704±0.195         | 0.892±0.081          | 0.244±0.060    | 0.156±0.007    | 0.241±0.039    | 0.419±0.055         | 0.263±0.100          | 28day |
| CBH/MBC                      | 0.053±0.002    | 0.181±0.005    | 0.066±0.002    | 0.099±0.013         | 0.258±0.045          | 0.017±0.002    | 0.018±0.002    | 0.103±0.006    | 0.204±0.020         | 0.067±0.021          | 28day |
| NAG/MBC                      | 0.035±0.005    | 0.452±0.044    | 0.045±0.020    | 0.251±0.063         | 0.465±0.025          | 0.060±0.006    | 0.054±0.005    | 0.052±0.008    | 0.086±0.010         | 0.069±0.024          | 28day |
| LAP/MBC                      | 0.048±0.008    | 0.017±0.002    | 0.242±0.011    | 0.005±0.003         | 0.008±0.002          | 0.124±0.004    | 0.108±0.004    | 0.147±0.012    | 0.122±0.004         | 0.164±0.052          | 28day |
| AP/MBC                       | 1.448±0.117    | 0.841±0.056    | 1.043±0.043    | 0.892±0.096         | 0.891±0.207          | 1.694±0.290    | 1.659±0.045    | 1.586±0.156    | 1.542±0.380         | 1.730±0.583          | 28day |
| TN                           | 0.901±0.007    | 0.877±0.013    | 0.861±0.011    | 0.872±0.007         | 0.899±0.013          | 0.871±0.009    | 0.864±0.010    | 0.885±0.016    | 0.840±0.008         | 0.865±0.015          | 98day |
| SOC                          | 14.212±0.201   | 13.879±0.102   | 13.483±0.111   | 14.214±0.139        | 13.961±0.076         | 13.763±0.145   | 13.795±0.091   | 14.323±0.122   | 13.831±0.108        | 13.986±0.167         | 98day |
| C/N                          | 15.768±0.163   | 15.836±0.132   | 15.668±0.094   | 16.314±0.237        | 15.549±0.280         | 15.797±0.067   | 15.984±0.247   | 16.213±0.388   | 16.466±0.225        | 16.181±0.218         | 98day |
| DOC                          | 350.975±27.968 | 322.762±12.813 | 296.825±14.224 | 365.675±5.075       | 410.113±15.218       | 314.088±35.513 | 317.525±14.926 | 361.463±20.914 | 318.788±21.305      | 345.600±15.155       | 98day |
| DON                          | 101.150±2.007  | 92.913±2.133   | 85.188±2.696   | 91.488±2.051        | 103.025±4.204        | 83.163±3.087   | 76.813±1.523   | 84.413±1.238   | 77.613±1.474        | 94.138±4.099         | 98day |
| MBC                          | 672.296±57.824 | 681.778±56.198 | 702.667±62.951 | 516.445±94.851      | 551.111±143.495      | 696.593±18.167 | 759.333±55.986 | 722.667±36.083 | 673.111±52.840      | 1053.667±315.634     | 98day |
| MBN                          | 108.519±11.401 | 112.593±16.324 | 98.889±3.698   | 49.074±14.147       | 141.389±76.560       | 85.185±4.455   | 76.852±8.952   | 81.482±8.644   | 73.827±7.146        | 127.160±41.065       | 98day |
| MC/N                         | 6.269±0.455    | 6.299±0.584    | 7.071±0.408    | 11.864±1.580        | 9.411±2.672          | 8.226±0.367    | 10.087±0.650   | 9.030±0.560    | 9.281±0.804         | 8.513±0.469          | 98day |
| MBP                          | 36.626±1.767   | 34.362±4.811   | 9.899±6.512    | 22.891±7.547        | 22.901±5.166         | 58.207±4.909   | 25.695±7.477   | 20.949±3.082   | 36.329±17.992       | 59.458±2.833         | 98day |
| MC/P                         | 18.461±1.767   | 20.404±1.487   | 158.844±46.910 | 59.946±41.064       | 53.823±23.869        | 12.186±0.921   | 46.136±20.284  | 37.279±6.405   | 67.901±48.954       | 17.567±5.176         | 98day |
| MN/P                         | 2.983±0.350    | 3.326±0.427    | 23.629±7.445   | 6.180±4.394         | 8.537±4.353          | 1.492±0.140    | 5.043±2.542    | 4.279±0.929    | 8.474±6.492         | 2.120±0.677          | 98day |
| TP                           | 0.246±0.007    | 0.248±0.002    | 0.225±0.026    | 0.211±0.016         | 0.273±0.005          | 0.227±0.026    | 0.284±0.006    | 0.246±0.003    | 0.241±0.011         | 0.259±0.003          | 98day |
| C/P                          | 57.946±1.231   | 55.871±0.442   | 62.610±8.043   | 68.309±4.592        | 51.231±0.965         | 63.904±9.323   | 48.705±1.212   | 58.146±0.907   | 57.848±2.796        | 54.121±1.093         | 98day |
| N/P                          | 3.677±0.100    | 33.529±0.039   | 3.996±0.511    | 4.190±0.282         | 3.297±0.067          | 4.040±0.573    | 3.046±0.032    | 3.592±0.099    | 3.512±0.153         | 3.347±0.091          | 98day |
| AP                           | 1.378±0.192    | 1.107±0.004    | 0.852±0.027    | 1.388±0.113         | 0.678±0.082          | 1.418±0.032    | 1.098±0.198    | 1.262±0.074    | 1.034±0.064         | 1.409±0.125          | 98day |
| NH <sub>4</sub> <sup>+</sup> | 1.002±0.092    | 0.890±0.089    | 1.146±0.145    | 1.106±0.108         | 0.816±0.093          | 0.880±0.059    | 0.944±0.053    | 1.042±0.164    | 0.965±0.063         | 0.590±0.026          | 98day |
| NO <sub>3</sub> <sup>-</sup> | 0.319±0.032    | 0.295±0.026    | 0.317±0.000    | 0.285±0.004         | 0.184±0.204          | 0.166±0.012    | 0.207±0.031    | 0.274±0.016    | 0.235±0.018         | 0.184±0.014          | 98day |
| BG/MBC                       | 0.420±0.032    | 0.345±0.020    | 0.564±0.045    | 0.791±0.154         | 0.552±0.166          | 0.172±0.026    | 0.134±0.009    | 0.376±0.049    | 0.033±0.071         | 0.135±0.023          | 98day |
| CBH/MBC                      | 0.125±0.009    | 0.082±0.011    | 0.271±0.019    | 0.420±0.082         | 0.378±0.100          | 0.017±0.004    | 0.016±0.002    | 0.091±0.018    | 0.124±0.025         | 0.033±0.007          | 98day |
| NAG/MBC                      | 0.145±0.038    | 0.043±0.004    | 0.232±0.010    | 0.445±0.093         | 0.512±0.170          | 0.049±0.013    | 0.029±0.001    | 0.258±0.043    | 0.136±0.044         | 0.046±0.011          | 98day |
| LAP/MBC                      | 0.099±0.004    | 0.085±0.009    | 0.037±0.002    | 0.049±0.011         | 0.023±0.009          | 0.100±0.010    | 0.094±0.010    | 0.099±0.010    | 0.224±0.032         |                      |       |
